## OPINION

# Clinical trials to go green—A sustainable argument for decentralised digital clinical trials

Simon H. Kohl<sup>1</sup>, Caroline Schmidt-Lucke<sup>1,2\*</sup>

**1** MEDIACC GmbH, Sächsische Str. 70, 10707 Berlin, Germany, **2** Charité-Universitätsmedizin Berlin, Berlin, Germany

\* [Caroline.Schmidt-Lucke@mediacc.org](mailto:Caroline.Schmidt-Lucke@mediacc.org)

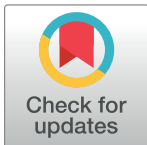

The digital revolution has made its way into the highly regulated field of clinical trials. With an increase in the use of digital technologies in clinical trials decentralised digital clinical trials (DDCTs) are disrupting the way evidence is generated for new medical treatments [1,2]. Recently, the European Union and Switzerland have published the first guidelines for DDCTs, providing a starting point for key stakeholders to understand the process and requirements [3,4]. Despite known advantages of DDCTs over traditional at least in part paper-based trials, there is still reluctance to the seemingly technically more complicated DDCTs. DDCTs are, however, faster and more cost-effective, more accessible for patients with the possibility to participate independently from where they live or their socio-economic background and reduce documentation effort. This improves recruitment rates and leads to more diversity in the representative study population enabling a better basis for decision-making in the health care system [5,6].

Since climate warming poses a multifaceted threat, impacting the environment and economy [7,8], it is worth focusing on another important previously unexplored aspect of the digitisation of clinical trials: saving energy and CO<sub>2</sub> emissions.

Informed consent forms, data protection information, test forms, questionnaires, registration forms, and visits to the study centres consume a lot of paper and energy in traditional clinical trials. Hence, digitising clinical trials not only improves the clinical trial system, but is also less harmful for the environment. But how much do we really save by fully digitising a clinical trial?

The aim of this opinion article was to add an additional and moreover, the most sustainable argument for DDCTs, namely the large reduction of energy and CO<sub>2</sub> emissions of DDCTs compared to traditional trials. To address this topic, we estimated the CO<sub>2</sub> savings of various scenarios involving decentralised and digital elements in comparison to a traditional middle-sized clinical trial from our institution.

Assuming a 25% dropout rate, a typical clinical trial with 2000 patients visiting one of the ten study sites nine times would require a total of 164,800 sheets of paper for case reports and patient forms, the study master file, and site files. This corresponds to a stack of paper higher than 16m and 799 kg CO<sub>2</sub> [9]. Additionally, monitoring visits to nationally distributed study centres are commonly necessary. On average, each of the ten centres will be monitored five times throughout the course of a clinical trial. If we assume the clinical monitor will be traveling to each of the centers by car, another 3,808 kg of CO<sub>2</sub> would be emitted into the atmosphere as estimated using the model by [10].

## OPEN ACCESS

**Citation:** Kohl SH, Schmidt-Lucke C (2023) Clinical trials to go green—A sustainable argument for decentralised digital clinical trials. *PLOS Digital Health* 2(10): e0000366. <https://doi.org/10.1371/journal.pdig.0000366>

**Editor:** Haleh Ayatollahi, Iran University of Medical Sciences, IRAN (ISLAMIC REPUBLIC OF)

**Published:** October 24, 2023

**Copyright:** © 2023 Kohl, Schmidt-Lucke. This is an open access article distributed under the terms of the [Creative Commons Attribution License](https://creativecommons.org/licenses/by/4.0/), which permits unrestricted use, distribution, and reproduction in any medium, provided the original author and source are credited.

**Funding:** The authors received no specific funding for this work.

**Competing interests:** The authors have declared that no competing interests exist.

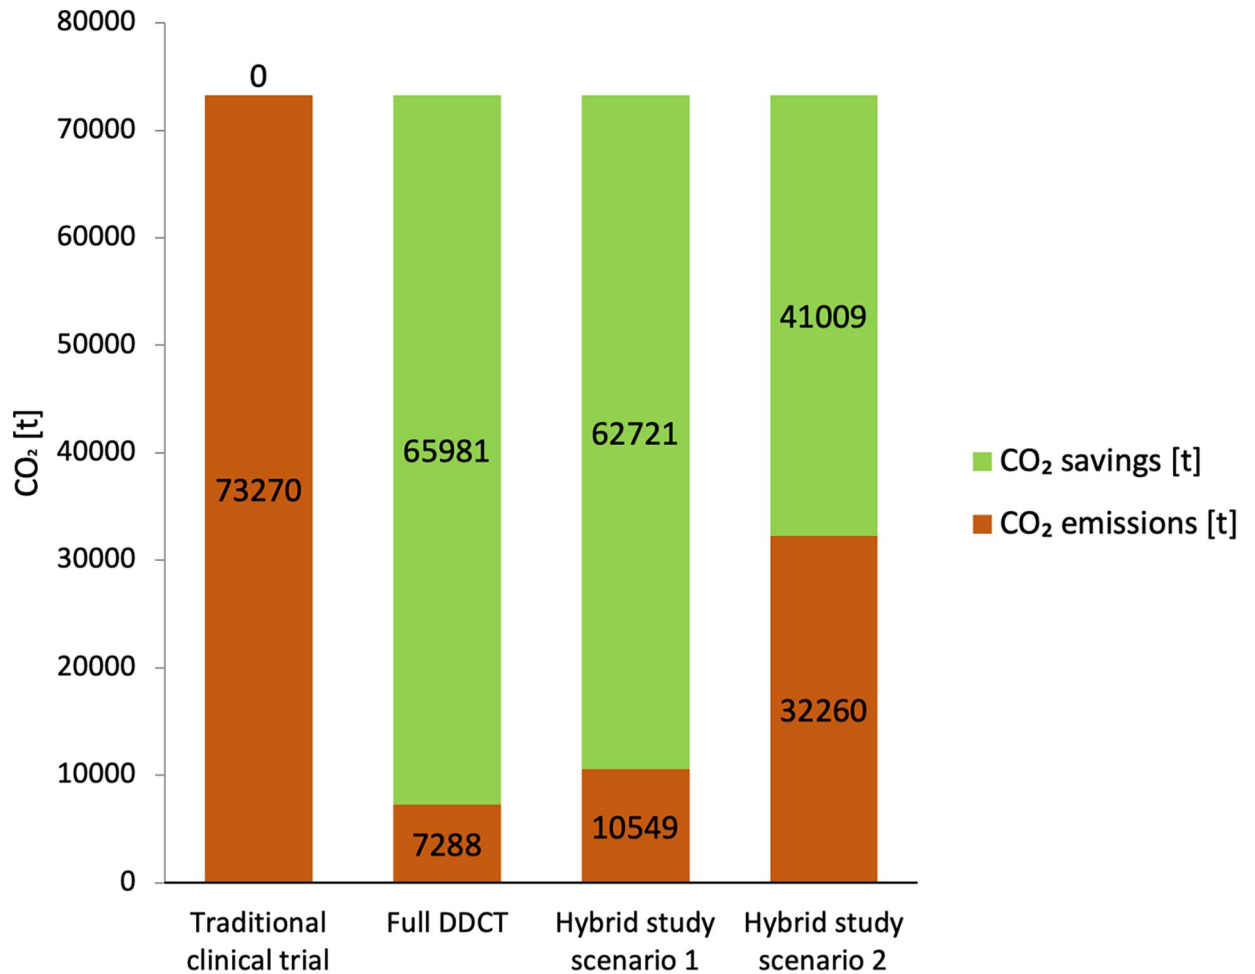

**Fig 1. Estimated CO<sub>2</sub> emissions and potential savings per year through decentralised and digital clinical trial (DDCT) methods in Europe.** The figure illustrates the estimated CO<sub>2</sub> emissions (brown columns) and potential savings (green columns) in different study scenarios comparing traditional clinical trial methods with various degrees of adoption of DDCT methods. The analysis focuses on the approximately 15,000 clinical trials initiated annually in Europe [15]. Full DDCT: fully digitized and decentralized trial without any study centres or paper-based processes; hybrid study scenario 1: digital clinical trial (DCT) including visits of the participants to the study centres but no on-site monitoring; hybrid study scenario 2: DCT including only an initiation and close-out visit, but no on-site monitoring visits in between.

<https://doi.org/10.1371/journal.pdig.0000366.g001>

Further, when study participants are required to travel to the study centres, an additional 237 kg of CO<sub>2</sub> will be emitted into the atmosphere. Finally, study documents need to be sent back and forth between the monitor and the centres over the course of the study. With one letter per patient and 20 g of CO<sub>2</sub> per letter [11], this adds up to another 40 kg of CO<sub>2</sub>. In total, this exemplary traditional, paper-based, clinical trial produced 4,885 kg of CO<sub>2</sub>.

Of course, DDCTs also need energy. Reading documents, filling out questionnaires on computers or smartphones (1 minute per page) [12], video consultations (1 hour with each study centre) [13], emails [11] (12 per patient), and—the largest part—server times (assuming 0.04 kw/h) to run and operate the study platform for two years all need electricity and emit CO<sub>2</sub>. In our exemplary study above, however, this amounts to just 486 kg CO<sub>2</sub>. Noteworthy, even this seemingly small proportion of CO<sub>2</sub> emission should make us aware of our responsibility and drive us to formulate precise scientific questions, which are then implemented consistently with high data quality in order to achieve meaningful results.

Hence, a classical clinical trial needs about 10 times more CO<sub>2</sub> and the full digitisation of a clinical trial saves 4,399 kg (90.1% reduction) of CO<sub>2</sub>. That is equivalent to a long-distance flight of 24,000 km [10] (almost four times from Berlin to New York) and 237 trees would have to grow for one year to make up for it [14]. Clearly, full digitisation of a clinical trial remains an ambitious goal and is not applicable in many study scenarios. The digitisation of clinical trial elements can pose additional risks and ethical concerns, especially when dealing with very vulnerable populations or complex medical procedures that require face-to-face interactions with physicians. Also, individuals who have limited access to digital tools or are not comfortable using them and may be excluded from a fully digitised trial.

As regulations rightfully stipulate, the rights, safety, dignity, and well-being of study participants should always be prioritised. Any additional burden placed on participants must be carefully weighed against the benefits of digitization [4]. Therefore, other scenarios that involve different levels of decentralised and digitised practices (hybrid studies) offer a more realistic solution while still significantly reducing carbon emissions.

If we extrapolate the estimations for the three different scenarios to the approximately 15,000 clinical trials starting every year in Europe, according to the International Clinical Trial Registry Platform of the WHO [15], there is the potential to save between 41,009 t and 65,981 t CO<sub>2</sub> per year (see Fig 1). The European Climate Law sets a clear target of achieving climate neutrality by 2050. The law mandates that all EU policies align with this objective and that all sectors of the economy and society—including medical research play their part [16]. By embracing DDCT's regulatory authorities, policymakers, funders, health care companies and researchers can play their part in achieving these legally mandated climate targets. It is about time to for all interested parties to sit down at the same table to securely enable this aim.

## Data availability statement

This is not an original research article. A spread sheet including our CO<sub>2</sub> estimations and assumptions can be found in [S1 File](#).

## Supporting information

**S1 File. CO<sub>2</sub> estimations and assumptions for three different study scenarios.**  
(XLSX)

## Author Contributions

**Conceptualization:** Simon H. Kohl, Caroline Schmidt-Lucke.

**Data curation:** Simon H. Kohl.

**Formal analysis:** Simon H. Kohl.

**Funding acquisition:** Caroline Schmidt-Lucke.

**Methodology:** Simon H. Kohl, Caroline Schmidt-Lucke.

**Project administration:** Caroline Schmidt-Lucke.

**Resources:** Caroline Schmidt-Lucke.

**Supervision:** Caroline Schmidt-Lucke.

**Validation:** Caroline Schmidt-Lucke.

**Writing – original draft:** Simon H. Kohl.

**Writing – review & editing:** Simon H. Kohl, Caroline Schmidt-Lucke.

## References

1. Masannek L, Gieseler P, Gordon WJ, Meuth SG, Stern AD. Evidence from ClinicalTrials.gov on the growth of Digital Health Technologies in neurology trials. *NPJ Digit Med.* 2023; 6(1):23. <https://doi.org/10.1038/s41746-023-00767-1> PMID: 36765123
2. Inan OT, Tenaerts P, Prindiville SA, Reynolds HR, Dizon DS, Cooper-Arnold K, et al. Digitizing clinical trials. *NPJ Digit Med.* 2020; 3:101. <https://doi.org/10.1038/s41746-020-0302-y> PMID: 32821856
3. Swissmedic, Swissethics. Position Paper on decentralised clinical trials (DCTs) with medicinal products in Switzerland 2022. Available from: <https://www.swissmedic.ch/swissmedic/en/home/humanarzneimittel/clinical-trials/clinical-trials-on-medicinal-products/publikationen.html>
4. ACT EU Initiative of the European Commission. Recommendation paper on decentralised elements in clinical trials 2022. Available from: [https://health.ec.europa.eu/system/files/2022/https://health.ec.europa.eu/system/files/2022-12/mp\\_decentralised-elements\\_clinical-trials\\_rec\\_en.pdf12/mp\\_decentralised-elements\\_clinical-trials\\_rec\\_en.pdf](https://health.ec.europa.eu/system/files/2022/https://health.ec.europa.eu/system/files/2022-12/mp_decentralised-elements_clinical-trials_rec_en.pdf12/mp_decentralised-elements_clinical-trials_rec_en.pdf).
5. Steinhubl SR, McGovern P, Dylan J, Topol EJ. The digitised clinical trial. *The Lancet.* 2017; 390(10108):2135. [https://doi.org/10.1016/S0140-6736\(17\)32741-1](https://doi.org/10.1016/S0140-6736(17)32741-1) PMID: 29143747
6. Steinhubl SR, Wolff-Hughes DL, Nilsen W, Iturriaga E, Califf RM. Digital clinical trials: creating a vision for the future. *NPJ Digit Med.* 2019; 2:126. <https://doi.org/10.1038/s41746-019-0203-0> PMID: 31872066
7. Romanello M, Di Napoli C, Drummond P, Green C, Kennard H, Lampard P, et al. The 2022 report of the Lancet Countdown on health and climate change: health at the mercy of fossil fuels. *Lancet.* 2022; 400(10363):1619–54. [https://doi.org/10.1016/S0140-6736\(22\)01540-9](https://doi.org/10.1016/S0140-6736(22)01540-9) PMID: 36306815
8. Watts N, Adger WN, Agnolucci P, Blackstock J, Byass P, Cai W, et al. Health and climate change: policy responses to protect public health. *Lancet.* 2015; 386(10006):1861–914. [https://doi.org/10.1016/S0140-6736\(15\)60854-6](https://doi.org/10.1016/S0140-6736(15)60854-6) PMID: 26111439
9. Wellenreuther F, Detzel A, Krüger M, Busch M. Aktualisierte Ökobilanz von Grafik- und Hygienepapier. Dessau-Rosslau: Umweltbundesamt (Germany); 2022 Nov. 113 p.
10. Helms H, Lambrecht U, Knörr W. Aktualisierung des Modells TREMOD–Mobile Machinery (TREMOMM). Dessau-Rosslau: Umweltbundesamt (Germany); 2010 Mai. 42 p.
11. Frage des Monats: E-Mail vs. Post. In: *Der Nachhaltige Warenkorb* [Internet]. 22 Mar 2019 [cited 20 Jun 2023]. Available: <https://www.nachhaltiger-warenkorb.de/klimabilanz-e-mail-vs-brief/>
12. Shibata H, Takano K, Omura K. Comparison of paper and computer displays in reading including frequent movement between pages. *Proceedings of the 26th Australian Computer-Human Interaction Conference on Designing Futures: the Future of Design.* New York, NY, USA: Association for Computing Machinery; 2014. pp. 549–558. <https://doi.org/10.1145/2686612.2686700>
13. Schien D, Shabajee P, Chandaria J, Williams D, Preist C. Using behavioural data to assess the environmental impact of electricity consumption of alternate television service distribution platforms. *Environmental Impact Assessment Review.* 2021; 91: 106661. <https://doi.org/10.1016/j.eiar.2021.106661>
14. What exactly is 1 tonne of CO2? We make it tangible. In: *Climate Neutral Group* [Internet]. [cited 20 Jun 2023]. Available: <https://www.climateneutralgroup.com/en/news/what-exactly-is-1-tonne-of-co2/>
15. World Health Organisation. Number of clinical trials by year, country, WHO region and income group (1999–2021): World Health Organisation; 2022 [Available from: <https://www.who.int/observatories/global-observatory-on-health-research-andhttps://www.who.int/observatories/global-observatory-on-health-research-and-development/monitoring/number-of-clinical-trials-by-year-country-who-region-and-income-groupdevelopment/monitoring/number-of-clinical-trials-by-year-country-who-region-and-income-group>].
16. Regulation (EU) 2021/1119: European Climate Law, (2021).
